# Supplementary material for: RNase III CLASH in MRSA uncovers sRNA regulatory networks coupling metabolism to toxin expression
Source: PubMed Central journal article supplement (PMC9217828; doi:10.1038/s41467-022-31173-y), 2022-06-22
Supplement: 41467_2022_31173_MOESM3_ESM.pdf [file 41467_2022_31173_MOESM3_ESM.pdf]

## Description of Additional Supplementary Files

Title: Supplementary Data 1

Description: Strains used in this study.

Title: Supplementary Data 2

Description: Oligonucleotides used in this study.

Title: Supplementary Data 3 and 4

Description: We include all our identified interactions in Supplementary Tables 3 (JKD6009) and 4 (USA300). These were filtered for statistical significance (see Methods for details; binomial test and Benjamini-Hochberg adjusted p-value  $\leq 0.05$ ). The 'total' sheet lists all interactions; 'bfsRNA-targets' lists all interactions including a bf sRNA; 'bfsRNA-bfsRNA' lists all interactions where each half of the hybrid is a bf sRNA; 'mRNA-mRNA' lists all interactions where each half of the hybrid is an mRNA; and 'mRNA-mRNA(AS)' lists all interactions between mRNAs and RNAs mapping antisense to mRNAs. Note that this final sheet lists mRNA-mRNA(AS) interactions involving cognate and non-cognate antisense RNAs.

| Row name       | Purpose                                                                                                                           |
|----------------|-----------------------------------------------------------------------------------------------------------------------------------|
| name           | Annotated gene name of first RNA fragment from hybrid                                                                             |
| rna_class      | RNA class (e.g. protein coding, small RNA...) of first RNA fragment from hybrid. Note that the prefix "as_" denotes antisense RNA |
| firstseq       | Sequence of the first RNA fragment from hybrid                                                                                    |
| start          | Genomic position of the first nucleotide of first RNA fragment from hybrid                                                        |
| end            | Genomic position of the last nucleotide of first RNA fragment from hybrid                                                         |
| name.1         | Annotated gene name of second RNA fragment from hybrid                                                                            |
| rna_class.1    | RNA class of second RNA fragment from hybrid                                                                                      |
| secondseq      | Sequence of the second RNA fragment from hybrid                                                                                   |
| start.1        | Genomic position of the first nucleotide of second RNA fragment from hybrid                                                       |
| end.1          | Genomic position of the last nucleotide of second RNA fragment from hybrid                                                        |
| MFE            | Multiple folding energy in kcal/mol of the interacting nucleotides within the hybrid as calculated by RNAduplex                   |
| bh_adj_p_value | Benjamini-Hochberg adjusted p value                                                                                               |
| hyb_count      | Number of hybrids identified for given interaction                                                                                |
| TSB_hybs       | Number of hybrids found in TSB-grown cells                                                                                        |

|                                |                                                                                                                 |
|--------------------------------|-----------------------------------------------------------------------------------------------------------------|
| RPMI_hybs                      | Number of hybrids found in RPMI-shifted cells                                                                   |
| LPM7_hybs (Supp. Table 4 only) | Number of hybrids found in LPM pH7-shifted cells                                                                |
| LPM5_hybs (Supp. Table 4 only) | Number of hybrids found in LPM pH5-shifted cells                                                                |
| condition                      | Conditions in which the interaction was found                                                                   |
| intermolecular base-pairs      | Sequence from each half of the hybrid predicted to interact through RNAduplex. Each half is separated by '&'    |
| intermolecular_structure       | RNA secondary structure of interacting nucleotides expressed in dot-bracket notation, as predicted by RNAduplex |

Title: Supplementary Data 5.

Description: Growth curves performed wild-type JKD6009, wild-type USA300 and the two RNase III-HTF strains used in this study.
